# Supplementary material for: The Impact of Weather Conditions on Biocides in Paints
Source: MDPI journal article supplement (doi:10.3390/ma15207368), 2022-10-20
Supplement: s1 [file s1]

# The impact of weather conditions on biocides in paints

## Supplementary Materials

*Ute Schoknecht\*, Helena Mathies*

Federal Institute for Materials Research and Testing, Unter den Eichen 87, 12205 Berlin

### SI 1 Composition of the investigated paints

| Ingredient                                                             | Red paint | White paint |
|------------------------------------------------------------------------|-----------|-------------|
|                                                                        | Wt.-%     | Wt.-%       |
| Water                                                                  | 17.32     | 17.32       |
| Cellulose ether                                                        | 0.19      | 0.19        |
| Sodium hydroxide solution 20%                                          | 0.19      | 0.19        |
| Na-Polyacrylate 35%                                                    | 0.28      | 0.28        |
| Polymer defoaming agent                                                | 0.28      | 0.28        |
| Methylisothiazolinone/benzisothiazolinone                              | 0.19      | 0.19        |
| TiO <sub>2</sub> chloride type, Color index: P.W. 6                    | 0.00      | 9.21        |
| Iron oxide red / Fe <sub>2</sub> O <sub>3</sub> / color index P.R. 101 | 9.21      | 0.00        |
| Mica D: 50 38 μ                                                        | 4.46      | 4.46        |
| CaCO <sub>3</sub> D: 50 5 μ                                            | 13.86     | 13.86       |
| CaCO <sub>3</sub> D: 50 15 μ                                           | 22.77     | 22.77       |
| Styrene acrylate 50 % MFT ca. 20 Grad                                  | 27.72     | 27.72       |
| Silicone resin emulsion modified polysiloxane 55%                      | 0.99      | 0.99        |
| Acrylate thickener 25%                                                 | 0.28      | 0.28        |
| Dipropylene glycol n-butylether                                        | 1.29      | 1.29        |
| Dispersion containing 25% terbutryn <sup>a</sup>                       | 0.20      | 0.20        |
| Dispersion containing 50% diuron <sup>a</sup>                          | 0.10      | 0.10        |
| Dispersion containing 8% OIT <sup>a</sup>                              | 0.62      | 0.62        |
| Dispersion containing 50% carbendazim <sup>a</sup>                     | 0.10      | 0.11        |
| Sum                                                                    | 100       | 100         |

<sup>a</sup> biocides dispersions including surfactants

## SI 2: Experiments

| Experiment | Application of paint | Dimension (height by width) | Area              | Amount of wet paint with biocide | Start               | End               | Months (total) | Active substance | Initial amount of active substance (calculated*) |
|------------|----------------------|-----------------------------|-------------------|----------------------------------|---------------------|-------------------|----------------|------------------|--------------------------------------------------|
|            |                      | in mm · mm                  | in m <sup>2</sup> | in g m <sup>-2</sup>             |                     |                   |                |                  | in mg m <sup>-2</sup>                            |
| A - white  | June 2017            | 760 · 720                   | 0.547             | 461                              | 11th July 2017      | 31st January 2019 | 18.5           | Carbendazim      | 231                                              |
|            |                      |                             |                   |                                  |                     |                   |                | Diuron           | 231                                              |
|            |                      |                             |                   |                                  |                     |                   |                | Terbutryn        | 231                                              |
|            |                      |                             |                   |                                  |                     |                   |                | OIT              | 231                                              |
| A - red    | June and July 2017   | 760 · 720                   | 0.547             | 461                              | 11th July 2017      | 31st January 2019 | 18.5           | Carbendazim      | 231                                              |
|            |                      |                             |                   |                                  |                     |                   |                | Diuron           | 231                                              |
|            |                      |                             |                   |                                  |                     |                   |                | Terbutryn        | 231                                              |
|            |                      |                             |                   |                                  |                     |                   |                | OIT              | 231                                              |
| B - white  | September 2017       | 760 · 760                   | 0.578             | 437                              | 13th September 2017 | 31st January 2019 | 16.5           | Carbendazim      | 219                                              |
|            |                      |                             |                   |                                  |                     |                   |                | Diuron           | 219                                              |
|            |                      |                             |                   |                                  |                     |                   |                | Terbutryn        | 219                                              |
|            |                      |                             |                   |                                  |                     |                   |                | OIT              | 219                                              |
| B - red    | September 2017       | 760 · 760                   | 0.578             | 437                              | 13th September 2017 | 31st January 2019 | 16.5           | Carbendazim      | 219                                              |
|            |                      |                             |                   |                                  |                     |                   |                | Diuron           | 219                                              |
|            |                      |                             |                   |                                  |                     |                   |                | Terbutryn        | 219                                              |
|            |                      |                             |                   |                                  |                     |                   |                | OIT              | 219                                              |

\* content of active substances in the wet pain according to the recipe: 0.05 %

### SI 3: Analytical methods

#### LC-MS Analysis

LC-System: Agilent 1100 Series  
Detector: Agilent 6130 Series Quadrupol  
Column: Phenomenex Synergi™, 4 µm Hydro-RP 80 Å, 150 mm x 2 mm  
Column temperature: 30 °C  
Eluent: A: 0.2% acetic acid in water (Millipore quality)  
B: acetonitrile, LC-MS quality (Chemsolute)  
Flow: 0.5 ml min<sup>-1</sup>  
Injection volume: 10 µl  
Gradient:

| Time | Solvent A | Solvent B |
|------|-----------|-----------|
| min  | %         | %         |
| 1    | 90        | 10        |
| 4    | 50        | 50        |
| 10   | 25        | 75        |
| 11   | 10        | 90        |
| 11.5 | 90        | 10        |
| 15   | 90        | 10        |

Quadrupole temperature: 100 °C  
MSD spray chamber: API-ES  
Drying gas flow: 12 l min<sup>-1</sup> nitrogen  
Nebulizer pressure: 40 psig  
Drying gas temperature: 300 °C  
Capillary voltage: positive mode: 1500 V, negative mode: 1500 V

#### LC-MS Analysis for OIT transformation products (N-octyl oxamic acid, N-octyl malonamic acid)

LC-System: Agilent 1100 Series  
Detector: Agilent 6130 Series Quadrupol  
Column:  
Column temperature: 25 °C  
Eluent: A: 0.2% formic acid in water (Millipore quality)  
B: 0.2 % formic acid in methanol, LC-MS quality (Chemsolute)  
Flow: 0.25 ml min<sup>-1</sup>  
Injection volume: 10 µl

Gradient:

| Time | Solvent A | Solvent B |
|------|-----------|-----------|
| min  | %         | %         |
| 1    | 100       | 0         |
| 4.5  | 0         | 100       |
| 7.5  | 0         | 100       |
| 7.8  | 100       | 0         |
| 15   | 100       | 0         |

Quadrupole temperature: 100 °C  
 MSD spray chamber: API-ES  
 Drying gas flow: 12 l min<sup>-1</sup> nitrogen  
 Nebulizer pressure: 40 psig  
 Drying gas temperature : 300 °C  
 Capillary voltage: positive mode: 1500 V, negative mode: 1500 V

Signals

| Substance                                     | Code       | Retention time | Mode     | Signal M+1 | Signal M-1 | Calibration range |
|-----------------------------------------------|------------|----------------|----------|------------|------------|-------------------|
|                                               |            | min            |          | m/z        | m/z        |                   |
| Terbutryn                                     |            | 8.93           | positive | 242        |            | 0.0004 - 0.2      |
| Terbumeton                                    |            | 7.04           | positive | 226        |            | 0.001 - 0.5       |
| 2-Hydroxy terbutryn                           | TBOH       | 5.13           | positive | 212        |            | 0.002 - 1.0       |
| Desethyl-2-hydroxy-terbutryn                  | TBOH-DesE  | 1.54           | positive | 184        |            | 0.004 - 2.0       |
| Desethyl terbutryn                            | TB-DesE    | 7.17           | positive | 214        |            | 0.002 - 1.0       |
| Terbutryn sulfoxide                           | TBSO       | 7.16           | positive | 258        |            | 0.002 - 0.5       |
| Diuron                                        |            | 7.95           | positive | 233        |            | 0.002 - 2.0       |
| 1-(3,4-Dichlorophenyl-3) -methyl urea         | DCPMU      | 7.49           | negative |            | 218        | 0.002 - 0.2       |
| 1-(3,4-Dichlorophenyl)-urea                   | DCPU       | 7.04           | negative |            | 203        | 0.001 - 0.05      |
| Dichloranilin                                 |            | 7.08           | positive | 162        |            | 0.005 - 5         |
| 3-(3,4-dichlorophenyl)-1- formyl-1-methylurea | Diuron-CHO | 8.69           | negative |            | 245        | 0.002 - 0.2       |
| Monuron                                       |            | 7.02           | positive | 199        |            | 0.002 - 0.10      |
| Carbendazim                                   |            | 3.70           | positive | 192        |            | 0.002 - 2.0       |
| Octylisothiazolinone                          | OIT        | 10.28          | positive | 214        |            | 0.005 - 1.0       |
| Octylamine                                    | OAM        | 5.38           | positive | 130        |            | 0.005 - 1.0       |
| N-Octyl oxamic acid                           | OOA        | 8.58           | negative |            | 200        | 0.001 - 0.1       |
| N-Octyl malonamic acid                        | OMA        | 8.56           | negative |            | 214        | 0.001 - 0.1       |

A matrix signal was observed for the same retention time and m/z as for TB-DesE.

## Standards

| Substance                                    | Code       | CAS         | Supplier         | Purity                  |
|----------------------------------------------|------------|-------------|------------------|-------------------------|
| Terbutryn                                    |            | 886-50-0    | Dr. Ehrenstorfer | 99.0%                   |
| Terbumeton                                   |            | 33693-04-8  | Sigma-Aldrich    | 99.2%                   |
| 2-Hydroxy terbutryn                          | TBOH       | 66753-07-9  | Sigma-Aldrich    | 98.6%                   |
| Desethyl-2-hydroxy-terbutryn                 | TBOH-DesE  | 66753-06-89 | Neochema         | 10 µg ml <sup>-1</sup>  |
| Desethyl terbutryn                           | TB-DesE    | 30125-65-6  | Neochema         | 99.8%                   |
| Terbutryn sulfoxide                          | TBSO       | 82985-33-9  | Neochema         | 98.5%                   |
| Diuron                                       |            | 330-54-1    | Sigma-Aldrich    | > 98.0%                 |
| 1-(3,4-Dichlorophenyl-3) -methyl urea        | DCPMU      | 3567-62-2   | Dr. Ehrenstorfer | 99.0%                   |
| 1-(3,4-Dichlorophenyl)-urea                  | DCPU       | 2327-02-8   | Neochema         | 100 µg ml <sup>-1</sup> |
| Dichloraniline                               | DCA        | 95-76-1     | Ultra Scientific | ≥ 98.0%                 |
| 3-(3,4-dichlorophenyl)-1-formyl-1-methylurea | Diuron-CHO | 76409-92-2  | Sigma-Aldrich    | contained DCPMU         |
| Monuron                                      |            | 150-68-5    | Sigma-Aldrich    | 99.9%                   |
| Carbendazim                                  |            | 10605-21-7  | Sigma-Aldrich    | 99.5%                   |
| Octylisothiazolinone                         | OIT        | 26530-20-1  | Dr. Ehrenstorfer | 99.5%                   |
| Octylamine                                   | OAM        | 111-86-4    | Sigma-Aldrich    | 99.5%                   |
| N-Octyl oxamic acid                          | OOA        | 3151-48-2   | ChemSpace        | 95.0%                   |
| N-Octyl malonamic acid                       | OMA        | 3151-49-3   | ChemSpace        | 95.0%                   |

#### SI 4 Analysed active substances and transformation products

A more comprehensive list of transformation products of terbutryn and diuron can be found in SI of [1].

| No | Substance (IUPAC name)                                                                                          | Code      | CAS        | Mass in g mol <sup>-1</sup> | Molecular formula                                 | Structure                                                                             |
|----|-----------------------------------------------------------------------------------------------------------------|-----------|------------|-----------------------------|---------------------------------------------------|---------------------------------------------------------------------------------------|
| 1  | Terbutryn<br>((4E)-4-(Ethylimino)-N-(2-methyl-2-propanyl)-6-(methylsulfanyl)-1,4-dihydro-1,3,5-triazin-2-amine) |           | 886-50-0   | 241.356                     | C <sub>10</sub> H <sub>19</sub> N <sub>5</sub> S  | 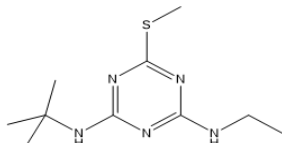   |
| 2  | Desethyl-terbutryn<br>(4-Imino-N-(2-methyl-2-propanyl)-6-(methylsulfanyl)-1,4-dihydro-1,3,5-triazine-2-amine)   | TB-DesE   | 30125-65-6 | 213.303                     | C <sub>8</sub> H <sub>15</sub> N <sub>5</sub> S   |    |
| 3  | 2-Hydroxy-terbutryn<br>(4-(Ethylamino)-6-[(2-methyl-2-propanyl)amino]-1,3,5-triazin-2(5H)-one)                  | TBOH      | 66753-07-9 | 211.264                     | C <sub>9</sub> H <sub>17</sub> N <sub>5</sub> O   |    |
| 4  | Desethyl-2-hydroxy-terbutryn<br>(4-Amino-6-[(2-methyl-2-propanyl)amino]-1,3,5-triazin-2(5H)-one)                | TBOH-DesE | 66753-06-8 | 183.211                     | C <sub>7</sub> H <sub>13</sub> N <sub>5</sub> O   |   |
| 5  | Terbutrynsulfoxid<br>(N-Ethyl-N'-(2-methyl-2-propanyl)-6-(methylsulfinyl)-1,3,5-triazine-2,4-diamine)           | TBSO      | 82985-33-9 | 257.356                     | C <sub>10</sub> H <sub>19</sub> N <sub>5</sub> OS |  |

|    |                                                                                                         |              |            |         |                                                                             |  |
|----|---------------------------------------------------------------------------------------------------------|--------------|------------|---------|-----------------------------------------------------------------------------|--|
| 6  | Terbumeton<br>(4E)-4-(Ethylimino)-6-methoxy-N-(2-methyl-2-propanyl)-1,4-dihydro-1,3,5-triazine-2-amine) | Terbumeton   | 33693-04-8 | 225.291 | C <sub>10</sub> H <sub>19</sub> N <sub>5</sub> O                            |  |
| 7  | Diuron<br>(3-(3,4-Dichlorophenyl)-1,1-dimethylurea)                                                     |              | 330-54-1   | 233.094 | C <sub>9</sub> H <sub>10</sub> Cl <sub>2</sub> N <sub>2</sub> O             |  |
| 8  | Desmethyl-diuron<br>(1-(3,4-Dichlorophenyl)-3-methylurea)                                               | DCPMU        | 3567-62-2  | 219.068 | C <sub>8</sub> H <sub>8</sub> Cl <sub>2</sub> N <sub>2</sub> O              |  |
| 9  | Desdimethyl-diuron<br>(1-(3,4-Dichlorophenyl)urea)                                                      | DCPU         | 2327-02-8  | 205.041 | C <sub>7</sub> H <sub>6</sub> Cl <sub>2</sub> N <sub>2</sub> O              |  |
| 10 | 3-(3,4-Dichlorophenyl)-1-formyl-1-methylurea                                                            | Diuron-CHO   | 76409-92-2 | 247.078 | C <sub>9</sub> H <sub>8</sub> Cl <sub>2</sub> N <sub>2</sub> O <sub>2</sub> |  |
| 11 | Monuron<br>3-(4-Chlorophenyl)-1,1-dimethylurea                                                          | Diuron-DesCl | 150-68-5   | 198.649 | C <sub>9</sub> H <sub>11</sub> ClN <sub>2</sub> O                           |  |
| 12 | Dichloroaniline<br>(3,4-Dichloroaniline)                                                                | DCA          | 95-76-1    | 162.017 | C <sub>6</sub> H <sub>5</sub> Cl <sub>2</sub> N                             |  |
| 13 | Carbendazim<br>(Methyl-benzimidazol-2-yl-carbamate)                                                     |              | 10605-21-7 | 191.187 | C <sub>9</sub> H <sub>9</sub> N <sub>3</sub> O <sub>2</sub>                 |  |

|    |                                                                |     |            |           |                    |                                                                                     |
|----|----------------------------------------------------------------|-----|------------|-----------|--------------------|-------------------------------------------------------------------------------------|
| 14 | Octylisothiazolinone<br>(2-Octyl-1,2-thiazol-3(2H)-one)        | OIT | 26530-20-1 | 213.340   | $C_{11}H_{19}NOS$  | 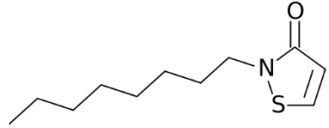 |
| 15 | Octylamine<br>(1-Octanamine)                                   | OAM | 111-86-4   | 129.243   | $C_8H_{19}N$       |  |
| 16 | N-Octyl oxamic acid                                            | OOA | 3151-48-2* | 201.1365* | $C_{10}H_{19}NO_3$ |  |
| 17 | N-Octyl malonamic acid<br>(3-(Octylamino)-3-oxopropanoic acid) | OMA | 3151-49-3  | 215.289   | $C_{11}H_{21}NO_3$ |  |

Mass data for originate from Chemspider [2] despite of OOA (data from Pubchem [3])



## SI 5: Weather conditions during the experiments

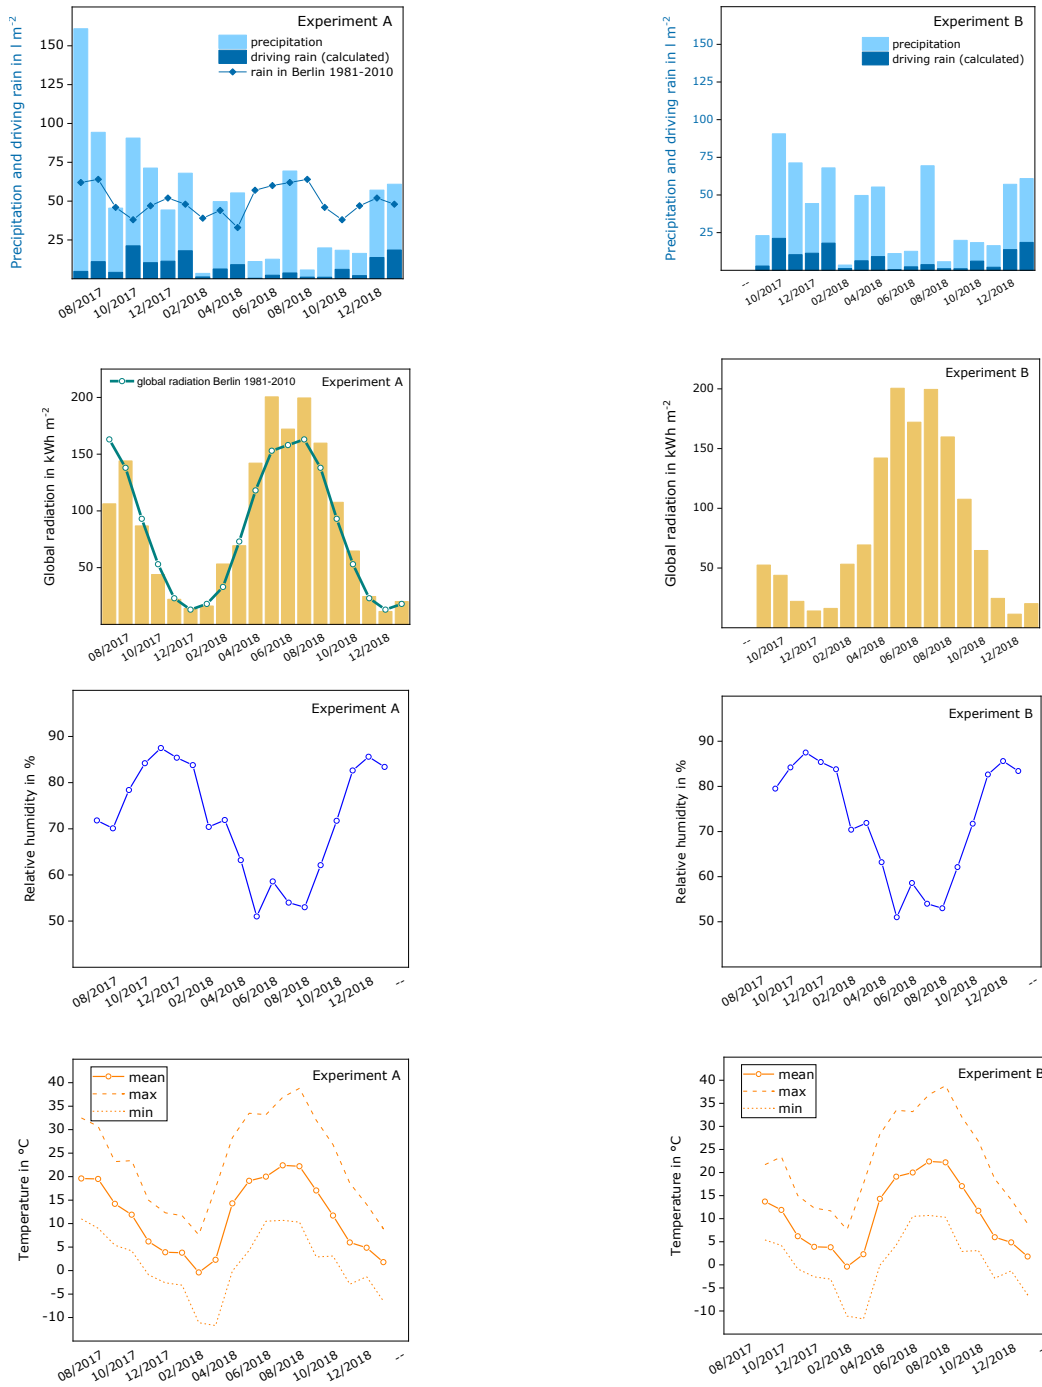

**Figure S1.** Monthly summarized weather data. Columns and data points for the first month of each experiment include only data from the start of the experiments. The graphs show total amounts of precipitation and calculated driving rain (top row), total amounts of global radiation (second row), mean values of relative humidity (third row), and mean as well as minimum and maximum temperatures (bottom row). Mean data for 1981 to 2010 measured in Berlin-Dahlem [4] are included for precipitation and global radiation. Driving rain was calculated according to EN ISO 15927-3 [5].

### SI 6: Surface temperatures on white and red paints

The surface temperatures on the test panels were measured by an infrared thermometer (EVENTEK) at different positions of the test panels. The air temperatures were obtained from the DWD (Deutscher Wetterdienst) for the test location.

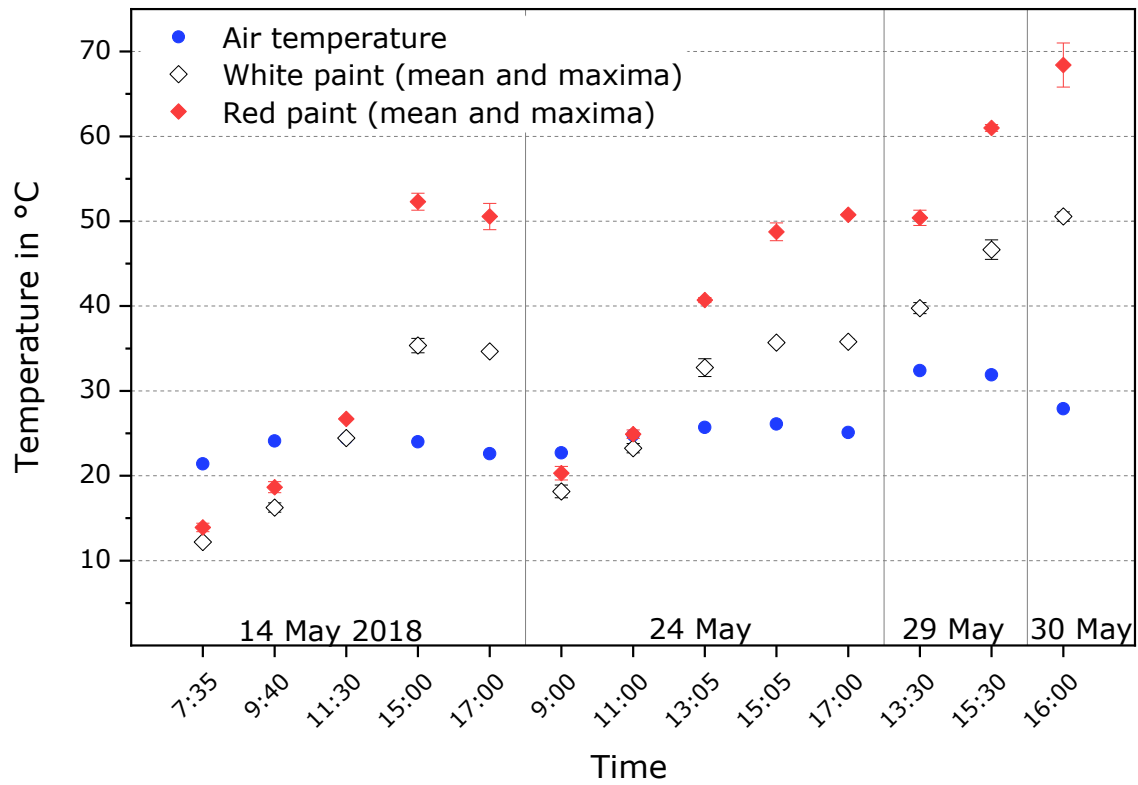

Figure S2. Surface temperatures on the test panels.

## SI 7: Concentration of active substances and transformation products in runoff-samples

The following graphs show the range of the concentrations of the different analytes including median and maximum values. The concentrations of several samples were below the lowest standard concentration. However, the signals were well evaluable.

Experiment A, Terbutryn and TPs

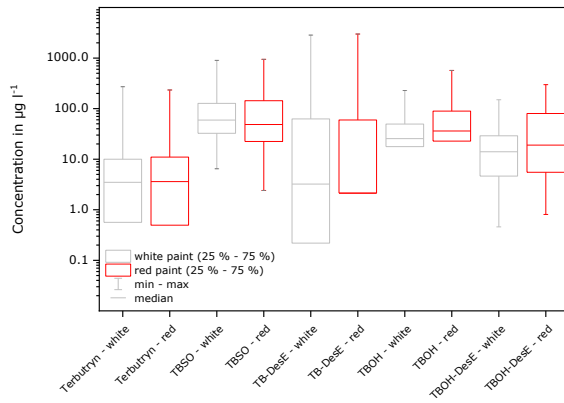

Experiment B, Terbutryn and TPs

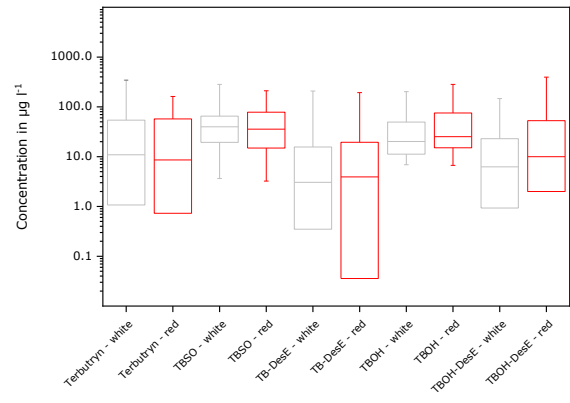

Experiment A, Diuron and TPs

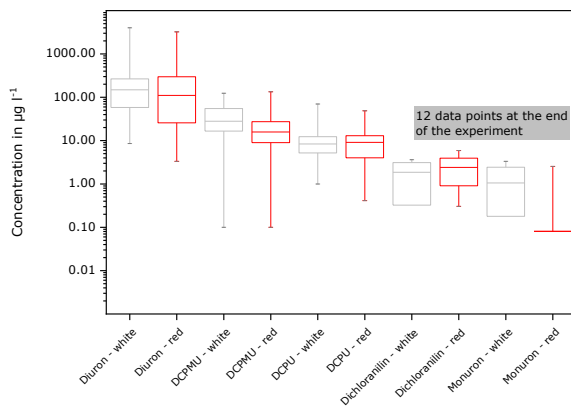

Experiment B, Diuron and TPs

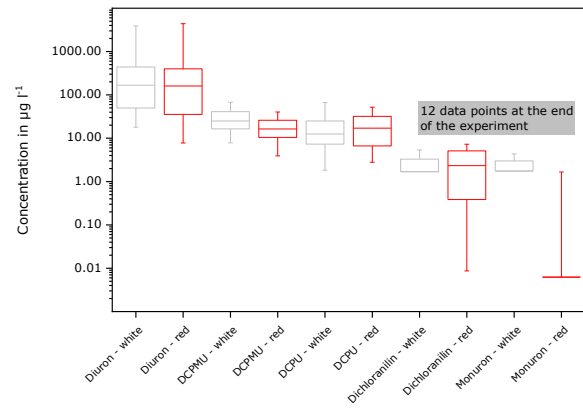

Experiment A, OIT and TPs

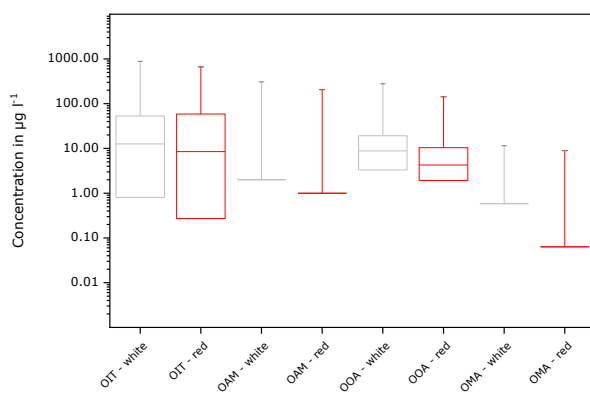

Experiment B, OIT and TPs

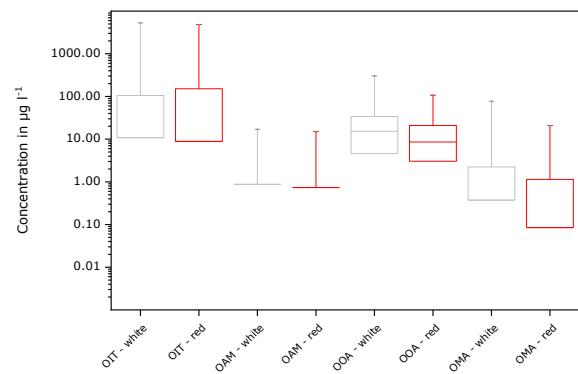

## Experiment A and B, Carbendazim

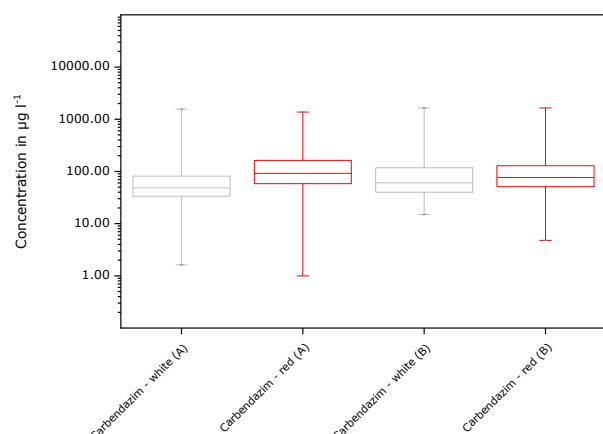

**Figure S3.** Concentration of active substances and transformation products in runoff samples.

Environmental quality standards (Umweltqualitätsnormen UQN, JD-UQN: annual average, ZHK-UQN: maximum allowable concentration) have been defined or proposed for a few substances in Germany. Concentrations of these substances exceed these standards in many runoff samples (see Table SI 7-1).

**Table S1.** Environmental quality standards.

| Substance   | JD-UQN                   | ZHK-UQN                 | Number of samples above ZHK-UQN |           |                            |           |
|-------------|--------------------------|-------------------------|---------------------------------|-----------|----------------------------|-----------|
|             |                          |                         | Experiment A<br>83 samples      |           | Experiment B<br>69 samples |           |
|             |                          |                         | White paint                     | Red paint | White paint                | Red paint |
| Terbutryn * | 0.065 µg l <sup>-1</sup> | 0.34 µg l <sup>-1</sup> | 64                              | 64        | 56                         | 53        |
| TB-DesE**   | 0.22 µg l <sup>-1</sup>  | 0.77 µg l <sup>-1</sup> | 55                              | 45        | 47                         | 46        |
| Diuron*     | 0.2 µg l <sup>-1</sup>   | 1.8 µg l <sup>-1</sup>  | 83                              | 83        | 69                         | 69        |
|             |                          |                         | Number of samples above JD-UQN  |           |                            |           |
| TBSO**      | 30 µg l <sup>-1</sup>    |                         | 64                              | 54        | 40                         | 39        |

\*defined values: Umweltbundesamt [6]

\*\*proposed values [7]

## SI 8: Emission curves

The data for transformation products in the graphs are related to the original amount of the biocidal active substances, i.e., the data show the amount of the biocidal active substance that is transformed to a certain product.

### Terbutryn and transformation products in runoff samples

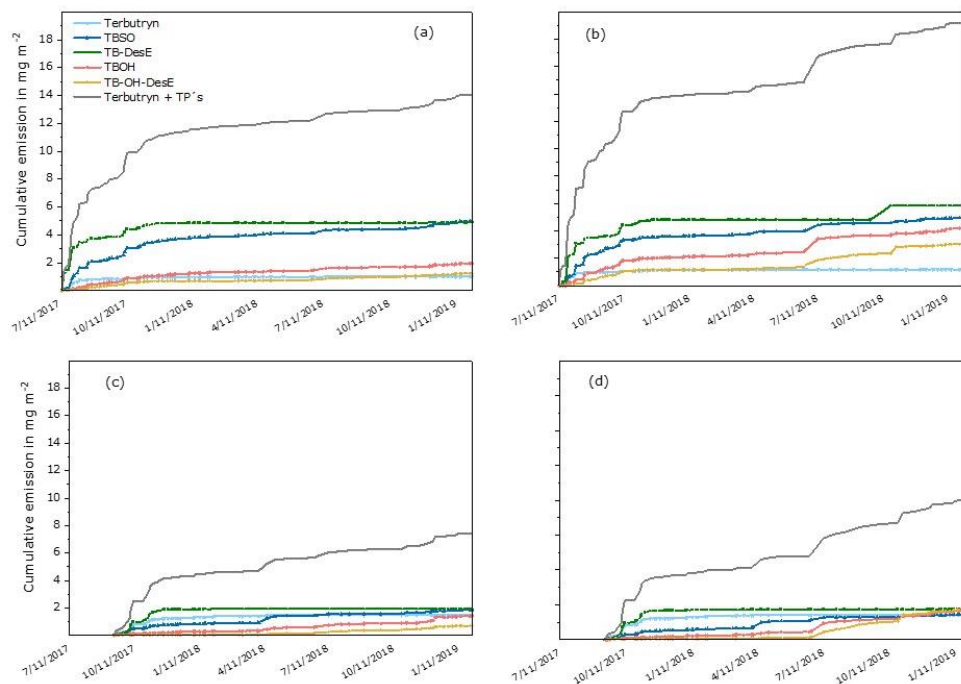

**Figure S4.** Emission curves of terbutryn and transformation products, (a) experiment A, white paint, (b) experiment A, red paint, (c) experiment B, white paint, (d) experiment B, red paint.

## Diuron and transformation products in runoff samples

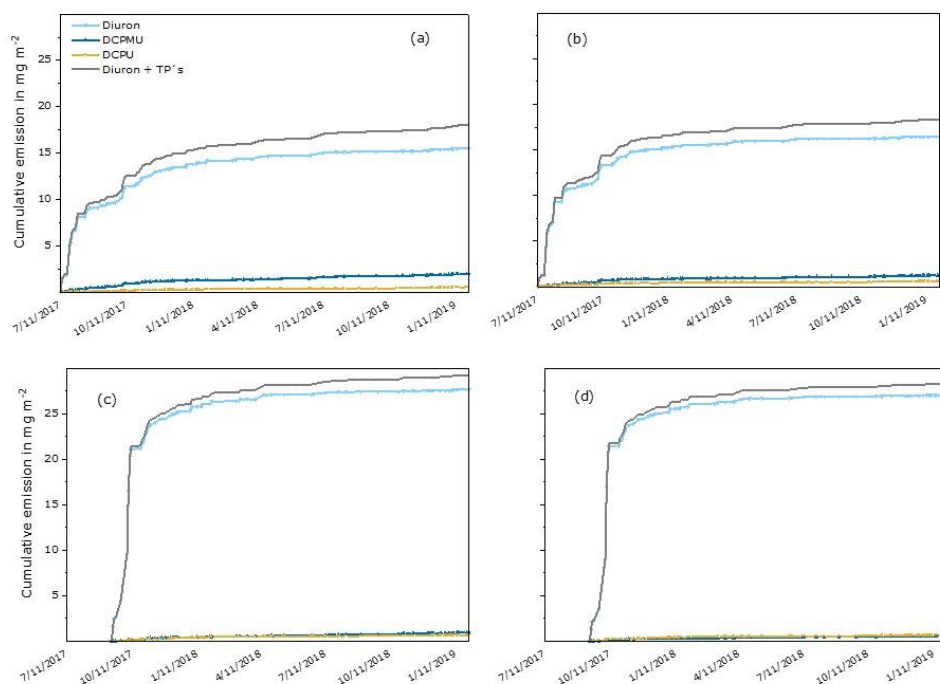

## Enlarged version to visualize emission courses of DCPMU and DCPU

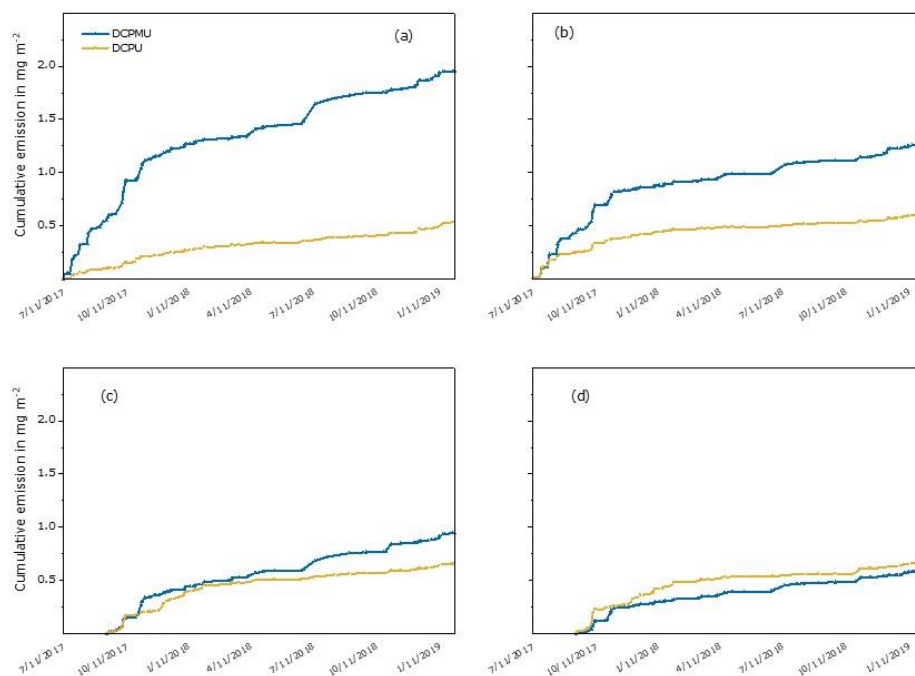

**Figure S5.** Emission curves of diuron and transformation products, (a) experiment A, white paint, (b) experiment A, red paint, (c) experiment B, white paint, (d) experiment B, red paint.

## OIT and transformation products in runoff samples

Five runoff samples of experiment A, collected between 25 September and 23 October 2018, were not analyzed for OOA and OMA. The missing values were estimated by using the mean concentrations of five samples before and five sample after the gap.

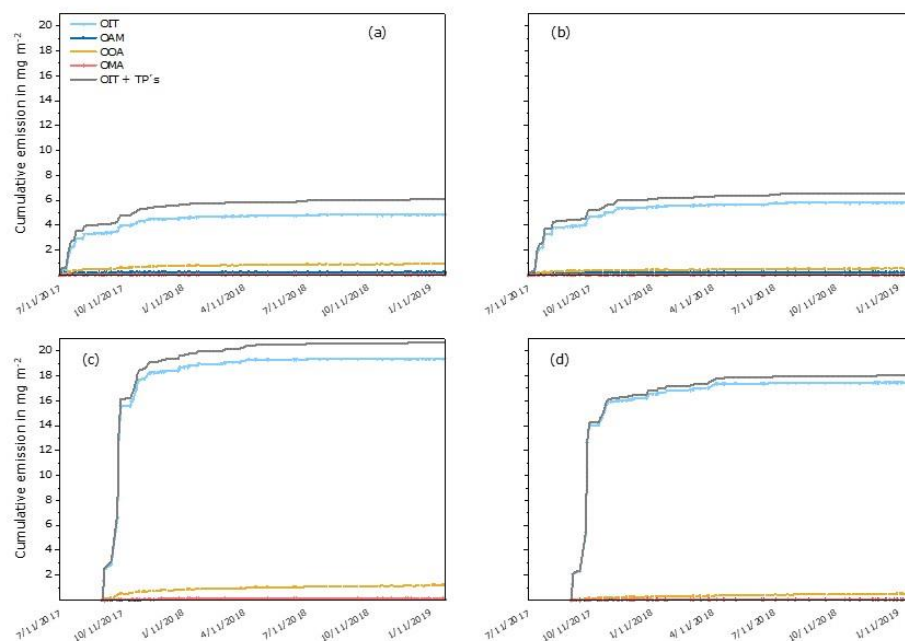

## Enlarged version to visualize emission courses of OAM, OOA and OMA

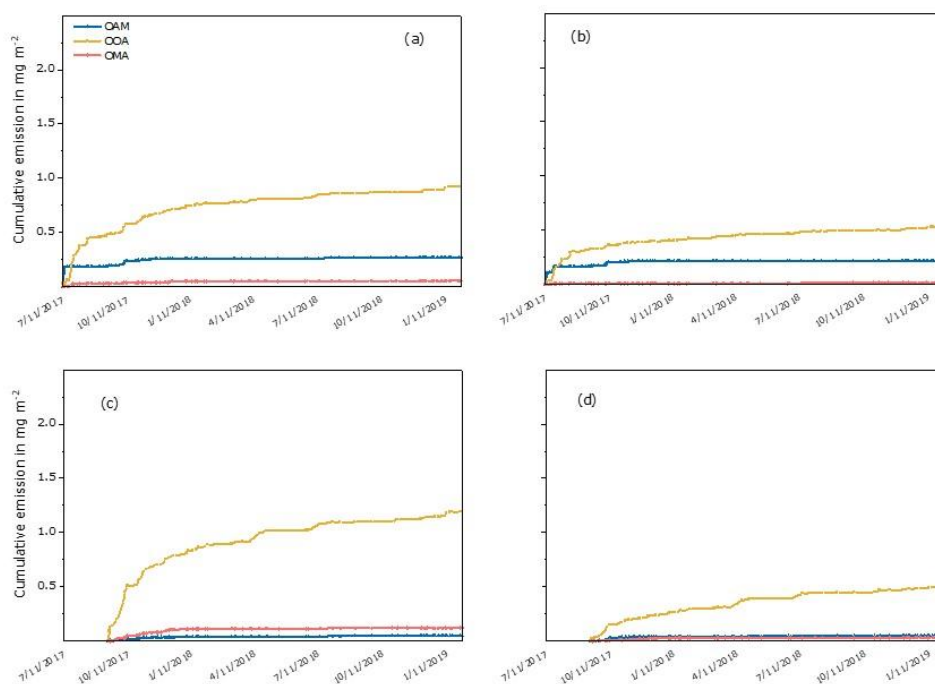

**Figure S6.** Emission curves of OIT and transformation products, (a) experiment A, white paint, (b) experiment A, red paint, (c) experiment B, white paint, (d) experiment B, red paint .

## Carbendazim in runoff samples

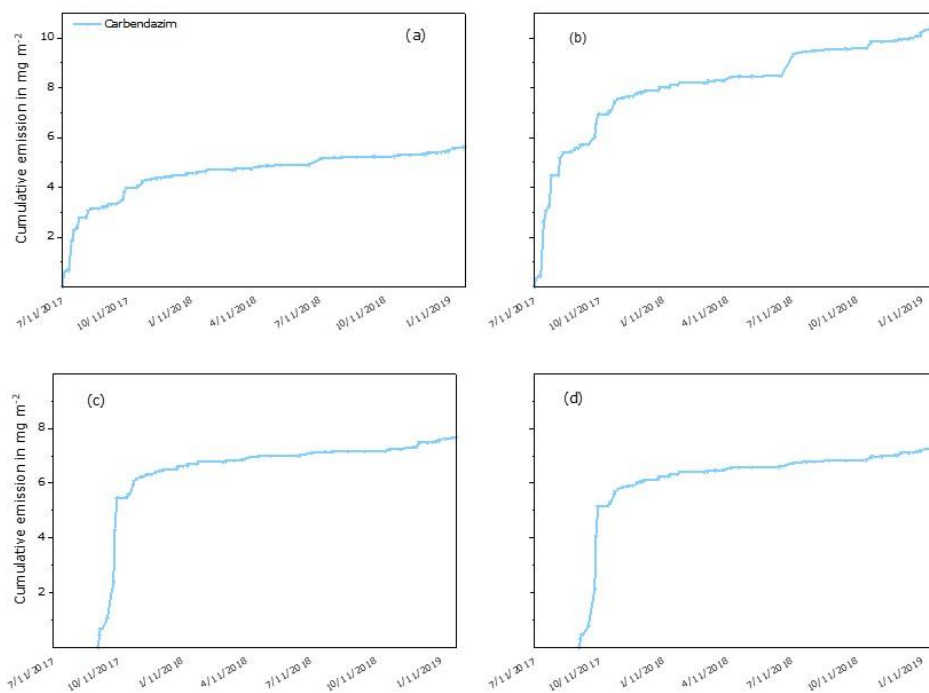

**Figure S7.** Emission curves of carbendazim, (a) experiment A, white paint, (b) experiment A, red paint, (c) experiment B, white paint, (d) experiment B, red paint.



## SI 9: Mass balances

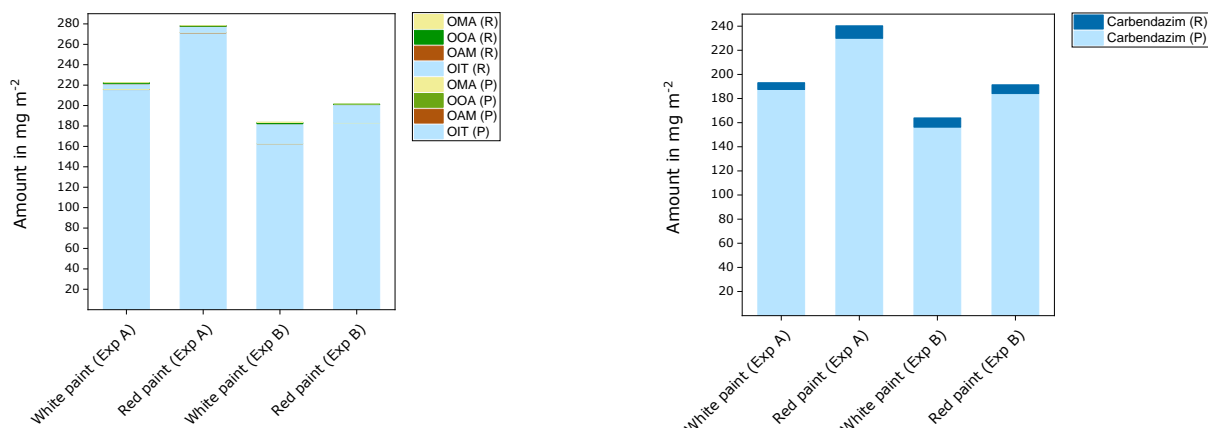

**Figure S8.** Mass balances of OIT and transformation products (left graph), and carbendazim (right graph) for the white and red test panels at the end of the semi-field experiment. The amounts of the transformation products are related to the initial amounts of the biocidal active substances, i.e., the initial amounts of transformed biocidal active substances were calculated and presented in the graphs. Data for the test panels (P): mean value of six sections, data for the runoff (R): sum of 83 (experiment A) and 69 (experiment B) runoff samples. Calculated original amounts for active substances: 230 mg m<sup>-2</sup> (experiment A) and 218 mg m<sup>-2</sup> (experiment B).

## References

- [1] Schoknecht, U.; Mathies, H.; Lisec, J. Leaching and transformation of film preservatives in paints induced by combined exposure to ultraviolet radiation and water contact under controlled laboratory conditions. *Water* (2021), 13, 2390. doi.org/10.3390/w13172390
- [2] Chemspider: <http://www.chemspider.com/>
- [3] Pubchem: [https://pubchem.ncbi.nlm.nih.gov/compound/Octylcarbamoyl\\_formic-acid](https://pubchem.ncbi.nlm.nih.gov/compound/Octylcarbamoyl_formic-acid)
- [4] Website of the Deutscher Wetterdienst: [https://www.dwd.de/DE/leistungen/klimadatendeutschland/vielj\\_mittelwerte.html](https://www.dwd.de/DE/leistungen/klimadatendeutschland/vielj_mittelwerte.html) and [https://www.dwd.de/DE/leistungen/solarenergie/strahlungskarten\\_mvs.html](https://www.dwd.de/DE/leistungen/solarenergie/strahlungskarten_mvs.html) (assessed on 2022 09 15)
- [5] EN ISO 15927-3:2009: Hygrothermal performance of buildings – Calculation and presentation of climatic data – Part 3: Calculation of driving rain index for vertical surfaces from hourly wind and rain data. Beuth Verlag: Berlin, Germany, 2009.
- [6] Website of the Umweltbundesamt: [https://www.umweltbundesamt.de/sites/default/files/medien/2875/dokumente/umweltqualitaetsnormen\\_des\\_chemischen\\_zustands\\_0.pdf](https://www.umweltbundesamt.de/sites/default/files/medien/2875/dokumente/umweltqualitaetsnormen_des_chemischen_zustands_0.pdf) (assessed on 2022 09 15)
- [7] Wünnemann, H., Weiß, K., Arndt, D., Baumann, M., Weiß, R., Ferling, H., Scholz-Göppel, K., Bucher, K., Feick, Ch., Hartmann, G., Kitzing, P., Szyja, M., Schwaiger, J.: Umweltqualitätsnormen für Binnengewässer; UBA-Texte 233/2020; Federal Environment Agency: Dessau-Roßlau, Germany, 2020
